# Supplementary material
Source: PubMed Central journal article supplement (PMC6437490)
Supplement: AAC.02201-18-s0001.pdf [file AAC.02201-18-s0001.pdf]

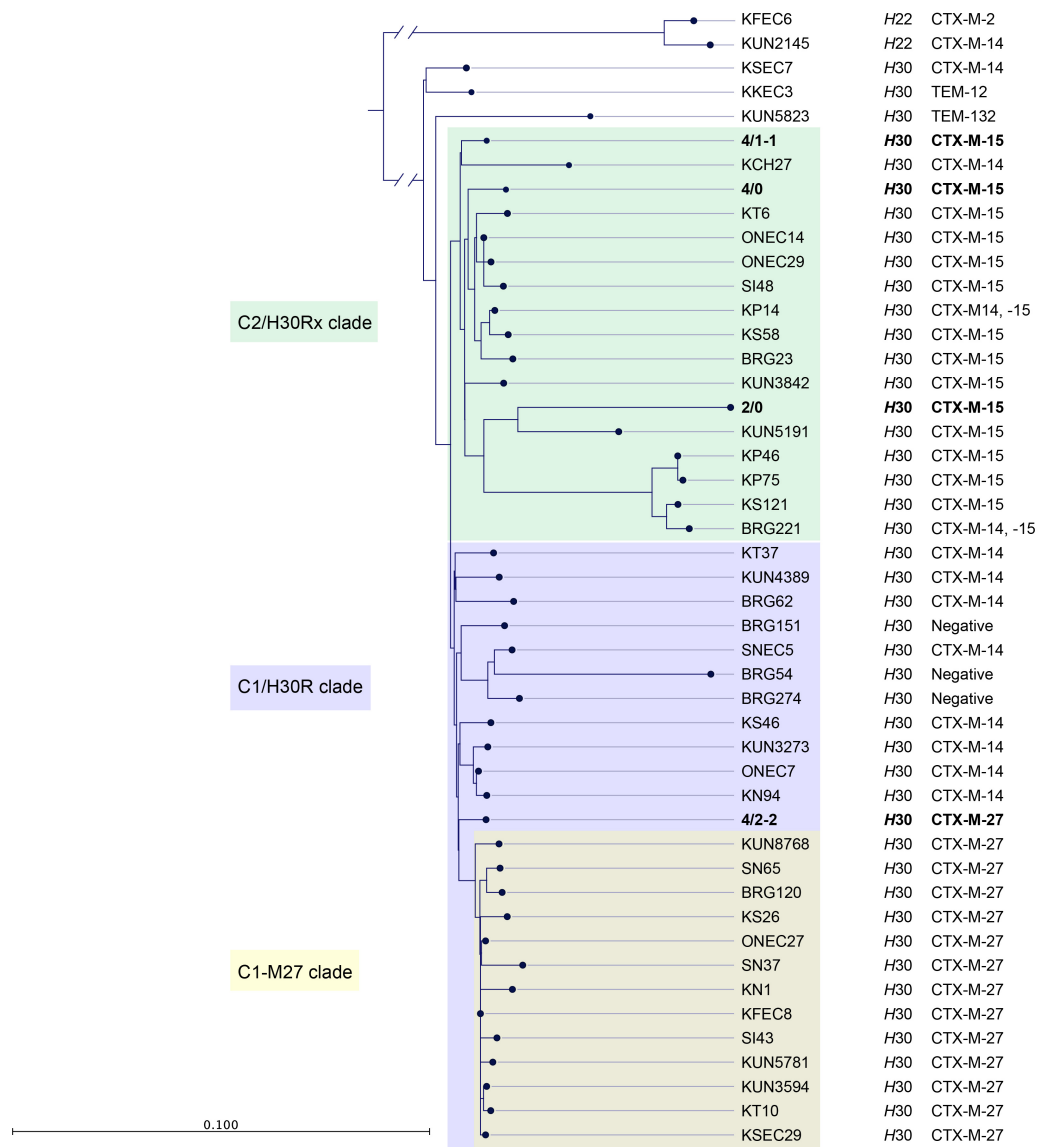

**Figure S1.** SNP-tree based of ST131 isolates on the dataset of Matsumura *et al.* (1). All sequences were aligned to EC958 and the sub-clades are marked as in (1). KFEC6 and KUN2145 were used as outgroups and have broken branch lengths.

## References

1. Matsumura Y, Pitout JDD, Gomi R, Matsuda T, Noguchi T, Yamamoto M, Peirano G, DeVinney R, Bradford PA, Motyl MR, Tanaka M, Nagao M, Takakura S, Ichiyama S. 2016. Global *Escherichia coli* Sequence Type 131 Clade with *bla*CTX-M-27 Gene. *Emerg Infect Dis* 22:1900–1907.

**Table S1.** Primers targeting plasmids without resistance genes of patient 2 and 7.

| Primer target | Sequence (5' -> 3')      |
|---------------|--------------------------|
| pat2.1_4.1kb  | F ACGGAGTTACATCATGAGCA   |
|               | R AAATCATGGTGTACAAAGAC   |
| pat2.1_2.3kb  | F CGGTATTACAATTGCACA     |
|               | R GAGGATTTGATTGGTGCGGA   |
| pat2.1_2.1kb  | F AGTGAAAATGCGGATGTG     |
|               | R TGTGTGGAAAAGGTTGGG     |
| pat2.1_1.5kb  | F GATACCTGTGTAACCTT      |
|               | R CTATCGCTACGTGACTGG     |
| pat7.2_43kb   | F TTATCCACACTAAACTGTTC   |
|               | R GTGCTATTAAGCGCTTTAGC   |
| pat7.2_34kb   | F TCAATAAGATGGGGTAAAATCC |
|               | R TTATGATCCAGCGTTTAAA    |
| pat7.2_4.1kb  | F TCACAGCTTCAGCCACAC     |
|               | R TCACAGCTTCAGCCACAC     |
| pat7.2_1.5kb  | F AGGCAAAGAAAAACACCGA    |
|               | R GGGAGCAAAAACACGCAA     |

**Table S2.** Results from the NGS sequence analysis.

| Isolate | Chromosome /plasmid      | Size (bp) | MLST  | Replicon <sup>a</sup> | Best match in GenBank (identity/query coverage)           | Resistance genes <sup>b</sup>                                                                                                                                                                                                                     | Virulence genes <sup>c, d</sup>            |
|---------|--------------------------|-----------|-------|-----------------------|-----------------------------------------------------------|---------------------------------------------------------------------------------------------------------------------------------------------------------------------------------------------------------------------------------------------------|--------------------------------------------|
| 2/0     | p2/0.1                   | 135,053   |       | FIA, FIB, FII         | pEclMT16316 (CP023816.1) (99%/80%)                        | <i>dfrA17, aadA5, sul1, bla<sub>TEM-1b</sub>, mphA, tetA(B)</i> (partial)                                                                                                                                                                         |                                            |
|         | Chromosome               |           | ST131 |                       |                                                           | <i>bla<sub>CTX-M-15</sub></i> ( <i>ISEcp1/ctx-m-15</i> (3214 bp) inserted in <i>mppA</i> ), Resistance mutations conferring resistance to; Quinolones [ <i>gyrA</i> (S83L, D87N, A828S) and <i>parC</i> (S80I, E84V, A192V, A471G, D475E, Q481H)] | <i>gad, sat, iha, nfaE, ireA, iss</i>      |
| 2/1     | p2/1.1                   | 153,195   |       | FIA, FIB, FII         | pEclMT16316 (CP023816.1) (99%/80%)                        | <i>bla<sub>CTX-M-15</sub>, dfrA17, aadA5, sul1, bla<sub>TEM-1b</sub>, mphA, tetA(B)</i> (partial)                                                                                                                                                 |                                            |
|         | Chromosome               |           | ST131 |                       |                                                           | <i>bla<sub>CTX-M-15</sub></i> ( <i>ISEcp1/ctx-m-15</i> (3214 bp) inserted in <i>mppA</i> ), Resistance mutations conferring resistance to; Quinolones [ <i>gyrA</i> (S83L, D87N, A828S) and <i>parC</i> (S80I, E84V, A192V, A471G, D475E, Q481H)] | <i>gad, sat, iha, nfaE, ireA, iss</i>      |
| 2/2     | p2/2.1                   | 153,195   |       | FIA, FIB, FII         | pEclMT16316 (CP023816.1) (99%/80%)                        | <i>bla<sub>CTX-M-15</sub>, dfrA17, aadA5, sul1, bla<sub>TEM-1b</sub>, mphA, tetA(B)</i> (partial)                                                                                                                                                 |                                            |
|         | Chromosome               |           | ST131 |                       |                                                           | <i>bla<sub>CTX-M-15</sub></i> ( <i>ISEcp1/ctx-m-15</i> (3214 bp) inserted in <i>mppA</i> ), Resistance mutations conferring resistance to; Quinolones [ <i>gyrA</i> (S83L, D87N, A828S) and <i>parC</i> (S80I, E84V, A192V, A471G, D475E, Q481H)] | <i>gad, sat, iha, nfaE, ireA, iss</i>      |
| 2/3     | p2/3.1                   | 153,195   |       | FIA, FIB, FII         | pEclMT16316 (CP023816.1) (99%/80%)                        | <i>bla<sub>CTX-M-15</sub>, dfrA17, aadA5, sul1, bla<sub>TEM-1b</sub>, mphA, tetA(B)</i> (partial)                                                                                                                                                 |                                            |
|         | Chromosome               |           | ST131 |                       |                                                           | <i>bla<sub>CTX-M-15</sub></i> ( <i>ISEcp1/ctx-m-15</i> (3214 bp) inserted in <i>mppA</i> ), Resistance mutations conferring resistance to; Quinolones [ <i>gyrA</i> (S83L, D87N, A828S) and <i>parC</i> (S80I, E84V, A192V, A471G, D475E, Q481H)] | <i>gad, sat, iha, nfaE, ireA, iss</i>      |
| 2/4     | p2/4.1                   | 130,502   |       | FIA, FIB, FII         | pEclMT16316 (CP023816.1) (99%/80%)                        | <i>dfrA17, aadA5, sul1, bla<sub>TEM-1b</sub>, mphA</i>                                                                                                                                                                                            |                                            |
|         | Chromosome               |           | ST131 |                       |                                                           | <i>bla<sub>CTX-M-15</sub></i> ( <i>ISEcp1/ctx-m-15</i> (3214 bp) inserted in <i>mppA</i> ), Resistance mutations conferring resistance to; Quinolones [ <i>gyrA</i> (S83L, D87N, A828S) and <i>parC</i> (S80I, E84V, A192V, A471G, D475E, Q481H)] | <i>gad, sat, iha, nfaE, ireA, iss</i>      |
| 4/0     | p4/0.1                   | 138,672   |       | FIA, FII              | <i>E. coli</i> NCTC 13441 plasmid (LT632321.1) (100%/96%) | <i>bla<sub>CTX-M-15</sub>, dfrA17, aadA5, sul1, mphA, tetA(A), catB3</i> (partial), <i>bla<sub>OXA-1</sub>, aac(6)-Ib-cr, aac(3)IIa</i>                                                                                                           |                                            |
|         | p4/0.2                   | 110,452   |       | ND                    | pECOH89 (HG530657) (98%/91%)                              |                                                                                                                                                                                                                                                   |                                            |
|         | (p4/0.3) cryptic plasmid |           |       |                       |                                                           |                                                                                                                                                                                                                                                   | <i>cci</i>                                 |
|         | Chromosome               |           | ST131 |                       |                                                           | Resistance mutations conferring resistance to; Quinolones [ <i>gyrA</i> (S83L, D87N, A828S) and <i>parC</i> (S80I, E84V, A192V, A471G, D475E, Q481H)]                                                                                             | <i>gad, sat, iha, nfaE, ireA, iss, nf1</i> |
| 4/1-1   | p4/1-1.1                 | 181,324   |       | FIA, FIB, FII         | pYDC107_184 (CP025708.1) (99%/86%)                        | <i>aph(3)1a, bla<sub>CTX-M-15</sub>, sul1, bla<sub>TEM-1b</sub>, mphA, tetA(A), catB3</i> (partial), <i>bla<sub>OXA-1</sub>, aac(6)-Ib-cr, aadA2, dfrA12</i>                                                                                      |                                            |
|         | p4/1-1.2                 | 33,067    |       | IncX4                 | pBS512_33 (CP001059) (99%/100%)                           |                                                                                                                                                                                                                                                   |                                            |
|         | Chromosome               |           | ST131 |                       |                                                           | Resistance mutations conferring resistance to; Quinolones [ <i>gyrA</i> (S83L, D87N, A828S) and <i>parC</i> (S80I, E84V, A192V, A471G, D475E, Q481H)]                                                                                             | <i>gad, sat, iha, iss</i>                  |
| 4/1-2   | p4/1-2.1                 | 112,141   |       | ND                    | pKPX-2 (AP012056) (99%/86%)                               |                                                                                                                                                                                                                                                   |                                            |
|         | p4/1-2.2                 | 96,190    |       | IncFIB(pQil)          | pNDM-1fa (CP014757) (99%/56%)                             | <i>bla<sub>CTX-M-15</sub>, dfrA1, sul1, bla<sub>TEM-1b</sub>, tetA(A), catA1, catB3</i> (partial), <i>bla<sub>OXA-1</sub>, qnrS1, aac(6)-Ib-cr, aac(3)IIa, strAB</i>                                                                              |                                            |

|       |            |         |       |                     |                                          |                                                                                                                                                                                                                                           |                                                   |
|-------|------------|---------|-------|---------------------|------------------------------------------|-------------------------------------------------------------------------------------------------------------------------------------------------------------------------------------------------------------------------------------------|---------------------------------------------------|
|       | Chromosome |         | ST147 |                     |                                          | <i>oqxAB</i> , <i>bla<sub>SHV-11</sub></i><br>Resistance mutations conferring resistance to;<br>Quinolones [ <i>gyrA</i> (S83L) and <i>parC</i> (S80I)]                                                                                   |                                                   |
| 4/2-1 | p4/2-1.1   | 152,425 |       | FIA, FIB, FII       | pCA28 (CP009232)<br>(99%/88%)            | <i>bla<sub>CTX-M-15</sub></i> , <i>dfrA17</i> , <i>aadA5</i> , <i>sul1</i> , <i>bla<sub>OXA-1</sub></i> , <i>aac(6')-Ib-cr</i> ,<br><i>aac(3)IIa</i> , <i>catB3</i> (partial)                                                             |                                                   |
|       | p4/2-1.2   | 33,067  |       | IncX4               | pBS512-33 (CP001059)<br>(99%/100%)       |                                                                                                                                                                                                                                           |                                                   |
|       | Chromosome |         | ST167 |                     |                                          | <i>tetA(B)</i><br>Resistance mutations conferring resistance to;<br>Quinolones [ <i>gyrA</i> (S83L, D87N) and <i>parC</i> (S80I)], <i>nfsA</i><br>(In frame deletion of amino acids 77-79)]                                               | <i>gad</i> , <i>iss</i> , <i>capU</i>             |
| 4/2-2 | p4/2-2.1   | 125,877 |       | FIA, FIB, FII       | pCA28 (CP009232)<br>(99%/95%)            | <i>bla<sub>CTX-M-27</sub></i> , <i>dfrA17</i> , <i>aadA5</i> , <i>sul1</i> , <i>sul2</i> , <i>mphA</i> , <i>tetA(A)</i> ,<br><i>strAB</i>                                                                                                 | <i>senB</i>                                       |
|       | Chromosome |         | ST131 |                     |                                          | Resistance mutations conferring resistance to;<br>Quinolones [ <i>gyrA</i> (S83L, D87N, A828S) and <i>parC</i> (S80I,<br>E84V, A192V, A471G, D475E, Q481H)]                                                                               | <i>gad</i> , <i>sat</i> , <i>iha</i> , <i>iss</i> |
| 4/2-3 | p4/2-3.1   | 73,669  |       | <i>IncFIB(pQil)</i> | pNDM-1fa (CP014757)<br>(99%/53%)         | <i>bla<sub>CTX-M-15</sub></i> , <i>dfrA1</i> , <i>sul1</i> , <i>bla<sub>TEM-1b</sub></i> , <i>tetA(A)</i> , <i>catB3</i> (partial),<br><i>bla<sub>OXA-1</sub></i> , <i>qnrS1</i> , <i>aac(6')-Ib-cr</i> , <i>aac(3)IIa</i> , <i>strAB</i> |                                                   |
|       | Chromosome |         | ST147 |                     |                                          | <i>oqxAB</i> , <i>bla<sub>SHV-11</sub></i><br>Resistance mutations conferring resistance to;<br>Quinolones [ <i>gyrA</i> (S83L) and <i>parC</i> (S80I)]                                                                                   |                                                   |
| 4/3-1 | p4/3-1.1   | 152,425 |       | FIA, FIB, FII       | pCA28 (CP009232)<br>(99%/88%)            | <i>bla<sub>CTX-M-15</sub></i> , <i>dfrA17</i> , <i>aadA5</i> , <i>sul1</i> , <i>bla<sub>OXA-1</sub></i> , <i>aac(6')-Ib-cr</i> ,<br><i>aac(3)IIa</i> , <i>catB3</i> (partial)                                                             |                                                   |
|       | p4/3-1.2   | 67,839  |       | FII                 | pVR50A (CP011135)<br>(99%/92%)           | <i>bla<sub>TEM-1b</sub></i>                                                                                                                                                                                                               |                                                   |
|       | p4/3-1.3   | 33,067  |       | IncX4               | pBS512-33 (CP001059)<br>(99%/100%)       |                                                                                                                                                                                                                                           |                                                   |
|       | Chromosome |         | ST167 |                     |                                          | <i>tetA(B)</i><br>Resistance mutations conferring resistance to;<br>Quinolones [ <i>gyrA</i> (S83L, D87N) and <i>parC</i> (S80I)], <i>nfsA</i><br>(In frame deletion of amino acids 77-79)]                                               | <i>gad</i> , <i>iss</i> , <i>capU</i>             |
| 4/3-2 | p4/3-2.1   | 181,324 |       | FIA, FIB, FII       | pYDC107_184<br>(CP025708.1)<br>(99%/86%) | <i>bla<sub>CTX-M-15</sub></i> , <i>sul1</i> , <i>bla<sub>TEM-1b</sub></i> , <i>mphA</i> , <i>tetA(A)</i> , <i>catB3</i> (partial),<br><i>bla<sub>OXA-1</sub></i> , <i>aac(6')-Ib-cr</i> , <i>aph(3')Ia</i> , <i>aadA2</i> , <i>dfrA12</i> |                                                   |
|       | p4/3-2.2   | 33,067  |       | IncX4               | pBS512-33 (CP001059)<br>(99%/100%)       |                                                                                                                                                                                                                                           |                                                   |
|       | Chromosome |         | ST131 |                     |                                          | Resistance mutations conferring resistance to;<br>Quinolones [ <i>gyrA</i> (S83L, D87N, A828S) and <i>parC</i> (S80I,<br>E84V, A192V, A471G, D475E, Q481H)]                                                                               | <i>gad</i> , <i>sat</i> , <i>iha</i> , <i>iss</i> |
| 4/4   | p4/4.1     | 125,877 |       | FIA, FIB, FII       | pCA28 (CP009232)<br>(99%/95%)            | <i>bla<sub>CTX-M-27</sub></i> , <i>dfrA17</i> , <i>aadA5</i> , <i>sul1</i> , <i>sul2</i> , <i>mphA</i> , <i>tetA(A)</i> ,<br><i>strAB</i>                                                                                                 | <i>senB</i>                                       |
|       | p4/4.2     | 67,839  |       | FII                 | pVR50A (CP011135)<br>(99%/92%)           | <i>bla<sub>TEM-1b</sub></i>                                                                                                                                                                                                               |                                                   |
|       | p4/4.3     | 33,067  |       | IncX4               | pBS512-33 (CP001059)<br>(99%/100%)       |                                                                                                                                                                                                                                           |                                                   |
|       | Chromosome |         | ST131 |                     |                                          | Resistance mutations conferring resistance to;<br>Quinolones [ <i>gyrA</i> (S83L, D87N, A828S) and <i>parC</i> (S80I,<br>E84V, A192V, A471G, D475E, Q481H)]                                                                               | <i>gad</i> , <i>sat</i> , <i>iha</i> , <i>iss</i> |
| 7/0   | p7/0.1     | 113,718 |       | FII, FIB            | pMVASt0167 (CP014493)<br>(99%/90%)       | <i>dfrA17</i> , <i>sul1</i> , <i>mphA</i> , <i>aadA5</i>                                                                                                                                                                                  | <i>senB</i>                                       |
|       | Chromosome |         | ST405 |                     |                                          | <i>bla<sub>CTX-M-14</sub></i><br>Resistance mutations conferring resistance to;<br>Quinolones [ <i>gyrA</i> (S83L, D87N) and <i>parC</i> (S80I)]                                                                                          | <i>gad</i> , <i>eilA</i> , <i>air</i>             |
| 7/1   | p7/1.1     | 118,997 |       | FII, FIB            | pMVASt0167 (CP014493)<br>(99%/90%)       | <i>dfrA17</i> , <i>sul1</i> , <i>mphA</i> , <i>aadA5</i> , <i>erm(B)</i>                                                                                                                                                                  | <i>senB</i>                                       |
|       | p7/1.2     | 42,913  |       | ND                  | pO157_Sal (CP001927)<br>(77%/65%)        |                                                                                                                                                                                                                                           |                                                   |
|       | Chromosome |         | ST405 |                     |                                          | <i>bla<sub>CTX-M-14</sub></i><br>Resistance mutations conferring resistance to;                                                                                                                                                           | <i>gad</i> , <i>eilA</i> , <i>air</i>             |

|     |            |         |       |          |                                                                             |                                                                                                                                                              |                       |
|-----|------------|---------|-------|----------|-----------------------------------------------------------------------------|--------------------------------------------------------------------------------------------------------------------------------------------------------------|-----------------------|
|     |            |         |       |          | Quinolones [ <i>gyrA</i> (S83L, D87N, R237H, D678E) and <i>parC</i> (S80I)] |                                                                                                                                                              |                       |
| 7/2 | p7/2.1     | 113,737 |       | FII, FIB | pMVAST0167 (CP014493) (99%/90%)                                             | <i>dfrA17, sul1, mphA, aadA5</i>                                                                                                                             | <i>senB</i>           |
|     | p7/2.2     | 42,913  |       | ND       | pO157_Sal (CP001927) (77%/65%)                                              |                                                                                                                                                              |                       |
|     | p7/2.3     | 34,371  |       | ND       | pN-Cit (JQ996149) (99%/97%)                                                 |                                                                                                                                                              |                       |
|     | Chromosome |         | ST405 |          |                                                                             | <i>bla</i> <sub>CTX-M-14</sub><br>Resistance mutations conferring resistance to; Quinolones [ <i>gyrA</i> (S83L, D87N, R237H, D678E) and <i>parC</i> (S80I)] | <i>gad, eilA, air</i> |
| 7/3 | p7/3.1     | 113,737 |       | FII, FIB | pMVAST0167 (CP014493) (99%/90%)                                             | <i>dfrA17, sul1, mphA, aadA5</i>                                                                                                                             | <i>senB</i>           |
|     | p7/3.2     | 42,913  |       |          | pO157_Sal (CP001927) (77%/65%)                                              |                                                                                                                                                              |                       |
|     | Chromosome |         | ST405 |          |                                                                             | <i>bla</i> <sub>CTX-M-14</sub><br>Resistance mutations conferring resistance to; Quinolones [ <i>gyrA</i> (S83L, D87N, R237H, D678E) and <i>parC</i> (S80I)] | <i>gad, eilA, air</i> |
| 7/4 | p7/4.1     | 113,737 |       | FII, FIB | pMVAST0167 (CP014493) (99%/90%)                                             | <i>dfrA17, sul1, mphA, aadA5</i>                                                                                                                             | <i>senB</i>           |
|     | Chromosome |         | ST405 |          |                                                                             | <i>bla</i> <sub>CTX-M-14</sub><br>Resistance mutations conferring resistance to; Quinolones [ <i>gyrA</i> (S83L, D87N, R237H, D678E) and <i>parC</i> (S80I)] | <i>gad, eilA, air</i> |

a) PlasmidFinder, b) ResFinder, c) VirulenceFinder, ND = not detected.

d) Virulence genes: *gad* (glutamate decarboxylase), *sat* (secreted autotransporter toxin), *iha* (adherence protein), *nfaE* (diffuse adherence fibrillar adhesin), *ireA* (siderophore receptor), *iss* (increased serum survival), *cci* (Cloacin), *cnf1* (Cytotoxic necrotizing factor), *capU* (Hexosyltransferase homolog), *senB* (Enterotoxin), *eilA* (Salmonella HilA homolog), *air* (Enteroaggregative immunoglobulin repeat protein)

**Table S3** Chromosomal differences in the isolates from patients 2 and 7.

| Isolate | Reference position chromosome | Type      | Nucleotide change | Amino acid change | Predicted protein/function                                                                                                                                                                                                                   |
|---------|-------------------------------|-----------|-------------------|-------------------|----------------------------------------------------------------------------------------------------------------------------------------------------------------------------------------------------------------------------------------------|
| 2/0     | Reference                     |           |                   |                   |                                                                                                                                                                                                                                              |
| 2/1     | 3434924                       | SNV       | C56T              | Gly19Gln          | glycosyl transferase family 1                                                                                                                                                                                                                |
|         | 4668147                       | Insertion | 409_410insA       |                   | <i>psiE</i>                                                                                                                                                                                                                                  |
| 2/2     | 888155                        | SNV       | C541T             | G181R             | IS66 family transposase                                                                                                                                                                                                                      |
|         | 2020099                       | SNV       | T175C             | L59syn            | hypothetical protein                                                                                                                                                                                                                         |
|         | 3434571                       | SNV       | G409A             | R137C             | glycosyl transferase family 1                                                                                                                                                                                                                |
|         | 4668147                       | Insertion | 409_410insA       |                   | <i>psiE</i>                                                                                                                                                                                                                                  |
| 2/3     | 888155                        | SNV       | C541T             | G181R             | IS66 family transposase                                                                                                                                                                                                                      |
|         | 1326915                       | SNV       | G56T              | A19D              | alpha/beta hydrolase                                                                                                                                                                                                                         |
|         | 2020099                       | SNV       | T175C             | L59syn            | hypothetical protein                                                                                                                                                                                                                         |
|         | 3434571                       | SNV       | G409A             | R137C             | glycosyl transferase family 1                                                                                                                                                                                                                |
|         | 3434829                       | SNV       | T151A             | K51*              | glycosyl transferase family 1                                                                                                                                                                                                                |
|         | 3434896                       | SNV       | C84A              | W28C              | glycosyl transferase family 1                                                                                                                                                                                                                |
|         | 4668147                       | Insertion | 409_410insA       |                   | <i>psiE</i>                                                                                                                                                                                                                                  |
| 2/4     | 130442                        | Deletion  | A                 |                   | Upstream of <i>hcp</i> or <i>aroP</i>                                                                                                                                                                                                        |
|         | 268798                        | SNV       | A288C             | G96syn            | <i>fliN</i>                                                                                                                                                                                                                                  |
|         | 398005..398017                | Deletion  | 13 nt             | H65fs             | <i>lacZ</i>                                                                                                                                                                                                                                  |
|         | 654994                        | SNV       | C904T             | V302I             | anion permease                                                                                                                                                                                                                               |
|         | 855484..913513                | Deletion  | 58029 nt          |                   | IS21 element, hypothetical proteins, toxin/antitoxin, antirestriction protein, transcriptional regulator, GTPase, <i>repB</i> family protein, IS66 element, ATPase, <i>ymgB/arIR</i> family protein, <i>evgA/S</i> , type 1 fimbriae protein |
|         | 1428692                       | SNV       | C -> T            |                   | Downstream of hypothetical protein                                                                                                                                                                                                           |
|         | 1630779                       | SNV       | G -> A            |                   | 11bp upstream of a partial <i>oppA</i>                                                                                                                                                                                                       |
|         | 1708252                       | SNV       | C -> T            |                   | 92bp upstream of glutathione S-transferase                                                                                                                                                                                                   |
|         | 1866244                       | SNV       | T29C              | L10P              | <i>mdtK (norM)</i>                                                                                                                                                                                                                           |
|         | 2319432                       | Insertion | 146_147insT       | N49fs             | glycosyltransferase family 2                                                                                                                                                                                                                 |
|         | 2319446                       | Deletion  | 133delT           | T45fs             | glycosyltransferase family 2                                                                                                                                                                                                                 |
|         | 2974171                       | SNV       | G277A             | D93N              | <i>ompA</i> family protein, <i>yfiB</i>                                                                                                                                                                                                      |
|         | 3110475                       | Deletion  | 451delA           | N152fs            | <i>barA</i>                                                                                                                                                                                                                                  |
|         | 3412884                       | SNV       | C324G             | D108E             | antitoxin                                                                                                                                                                                                                                    |
|         | 3437226                       | SNV       | G137A             | T46M              | ABC transporter ATP-binding protein                                                                                                                                                                                                          |
|         | 3875935                       | SNV       | C1685T            | P562L             | RNA-binding transcriptional accessory protein                                                                                                                                                                                                |
|         | 3880465                       | SNV       | C -> T            |                   | Downstream of transposase and methyl ester esterase                                                                                                                                                                                          |
|         | 4111641                       | Insertion | 1667_1670ins GGAT | T558fs            | adhesin                                                                                                                                                                                                                                      |
|         | 4668147                       | Insertion | 409_410insA       |                   | <i>psiE</i>                                                                                                                                                                                                                                  |
|         | 4718098..4737449              | Deletion  | 19351 nt          |                   | integrase, transcriptional regulator, DNA-binding protein, DNA methyltransferase, DNA helicase, <i>dprA</i> ,                                                                                                                                |
|         | 4829724                       | Deletion  | G                 |                   | 108bp upstream of an autotransporter outer membrane beta-barrel domain-containing protein                                                                                                                                                    |
|         | 5016654                       | SNV       | A257C             | L86*              | <i>fecR</i>                                                                                                                                                                                                                                  |
|         |                               |           |                   |                   |                                                                                                                                                                                                                                              |

**Table S3** continued.

| Isolate | Reference position chromosome | Type      | Nucleotide change | Amino acid change | Predicted protein                                                           |
|---------|-------------------------------|-----------|-------------------|-------------------|-----------------------------------------------------------------------------|
| 7/0     | Reference                     |           |                   |                   |                                                                             |
| 7/1     | 639458                        | SNV       | C1020T            |                   | CuzA/CzcA family heavy metal efflux RND transporter                         |
|         | 925324                        | SNV       | G310A             | Gln104*           | glutathione S-transferase                                                   |
|         | 2002107                       | SNV       | G310A             |                   | 3bp upstream of DUF481 domain-containing protein                            |
|         | 2317218                       | SNV       | T991C             | Phe331Leu         | hypothetical protein                                                        |
|         | 2333618                       | SNV       | C279G             |                   | IS200/IS605 family transposase                                              |
|         | 2339750                       | Insertion | 704_705insA       | Leu235fs          | O102 family O-antigen polymerase                                            |
|         | 2407185                       | SNV       | G267T             |                   | Phage major tail tube protein                                               |
|         | 2407200                       | SNV       | C252T             |                   | Phage major tail tube protein                                               |
|         | 2407205                       | SNV       | C247A             | Ala83Ser          | Phage major tail tube protein                                               |
|         | 2407257                       | SNV       | C195A             |                   | Phage major tail tube protein                                               |
|         | 2407839                       | SNV       | G816T             |                   | Phage tail protein                                                          |
|         | 2407851                       | SNV       | A804G             |                   | Phage tail protein                                                          |
|         | 2407866                       | SNV       | T789A             |                   | Phage tail protein                                                          |
|         | 2407899                       | SNV       | A756G             |                   | Phage tail protein                                                          |
|         | 2407902                       | SNV       | A753G             |                   | Phage tail protein                                                          |
|         | 2407932                       | SNV       | G723T             |                   | Phage tail protein                                                          |
|         | 2407956                       | SNV       | C699T             |                   | Phage tail protein                                                          |
|         | 2407965                       | SNV       | A690G             |                   | Phage tail protein                                                          |
|         | 2408016                       | SNV       | G639A             |                   | Phage tail protein                                                          |
|         | 2408124                       | SNV       | A531G             |                   | Phage tail protein                                                          |
|         | 2408151                       | SNV       | T504C             |                   | Phage tail protein                                                          |
|         | 2408159                       | SNV       | C496T             | Gly151Ser         | Phage tail protein                                                          |
|         | 2408175                       | SNV       | G480A             |                   | Phage tail protein                                                          |
|         | 2408202                       | SNV       | A453C             |                   | Phage tail protein                                                          |
|         | 2408217                       | SNV       | A438T             |                   | Phage tail protein                                                          |
|         | 2408247                       | SNV       | G408A             |                   | Phage tail protein                                                          |
|         | 2408301                       | SNV       | C354T             |                   | Phage tail protein                                                          |
|         | 2411114                       | SNV       | G1236A            |                   | Phage tail protein                                                          |
|         | 2411117                       | SNV       | G1233A            |                   | Phage tail protein                                                          |
|         | 2411156                       | SNV       | G1194A            |                   | Phage tail protein                                                          |
|         | 2411159                       | SNV       | G1191C            |                   | Phage tail protein                                                          |
|         | 2411162                       | SNV       | T1188C            |                   | Phage tail protein                                                          |
|         | 2411164                       | SNV       | C1186T            | Ala396Thr         | Phage tail protein                                                          |
|         | 2411178                       | SNV       | T1172A            | Tyr391Phe         | Phage tail protein                                                          |
|         | 2411378                       | SNV       | C972A             |                   | Phage tail protein                                                          |
|         | 2411381                       | SNV       | A969C             |                   | Phage tail protein                                                          |
|         | 2411408                       | SNV       | A942G             |                   | Phage tail protein                                                          |
|         | 2411417                       | SNV       | A933G             |                   | Phage tail protein                                                          |
|         | 2411436                       | SNV       | G914A             | Thr305Met         | Phage tail protein                                                          |
|         | 2411480                       | SNV       | C870T             |                   | Phage tail protein                                                          |
|         | 2411492                       | SNV       | A858G             |                   | Phage tail protein                                                          |
|         | 2411510                       | SNV       | A840C             |                   | Phage tail protein                                                          |
|         | 2411552                       | SNV       | G798A             |                   | Phage tail protein                                                          |
|         | 2411555                       | SNV       | A795G             |                   | Phage tail protein                                                          |
|         | 2411567                       | SNV       | T783C             |                   | Phage tail protein                                                          |
|         | 2411600                       | SNV       | T750C             |                   | Phage tail protein                                                          |
|         | 2411629                       | SNV       | T721C             |                   | Phage tail protein                                                          |
|         | 2411666                       | SNV       | A684C             |                   | Phage tail protein                                                          |
|         | 2411669                       | SNV       | C681T             |                   | Phage tail protein                                                          |
|         | 2411674                       | SNV       | T676G             | Lys226Glu         | Phage tail protein                                                          |
|         | 2411676-77                    | SNV       | GT673-674CG       | Thr225Arg         | Phage tail protein                                                          |
|         | 2411768                       | SNV       | T582C             |                   | Phage tail protein                                                          |
|         | 2942538                       | SNV       | A787G             | Cys263Arg         | <i>der</i>                                                                  |
|         | 3370102                       | SNV       | A315G             |                   | IS66 family insertion sequence                                              |
|         | 3526713                       | SNV       | G1709A            | Gly570Asp         | <i>rpoD</i>                                                                 |
|         | 4302774                       | SNV       | T628C             | Cys210ASer        | undecaprenyl-phosphatate alpha-N-acetylglucosaminyl 1-phosphate transferase |
|         | 4475933                       | Deletion  | G                 |                   | Downstream of RHS element sequence and hypothetical                         |
|         | 4535303                       | SNV       | T2289C            |                   | <i>rpoB</i>                                                                 |
|         | 4714412                       | SNV       | G799A             | His267Tyr         | <i>cadC</i>                                                                 |
|         | 4757500                       | SNV       | C237G             |                   | <i>eutJ, dnaK, uidC</i>                                                     |
|         | 5097335                       | SNV       | C575T             | Arg192His         | DNA-binding response regulator                                              |

|     |                  |           |         |           |                                                                                                                                                                                                                         |
|-----|------------------|-----------|---------|-----------|-------------------------------------------------------------------------------------------------------------------------------------------------------------------------------------------------------------------------|
| 7/2 | 3526713          | SNV       | G1709A  | Gly570Asp | <i>rpoD</i>                                                                                                                                                                                                             |
|     | 4096597^4096598  | Insertion | 16 nt   |           | UDP-galactose LPS alpha 1,2-galactosyltransferase                                                                                                                                                                       |
|     | 4278336          | SNV       | C273 G  |           | 23s rRNA                                                                                                                                                                                                                |
|     | 4714412          | SNV       | G799A   | His267Tyr | <i>cadC</i>                                                                                                                                                                                                             |
| 7/3 | 3526713          | SNV       | G1709A  | Gly570Asp | <i>rpoD</i>                                                                                                                                                                                                             |
|     | 4714412          | SNV       | G799A   | His267Tyr | <i>cadC</i>                                                                                                                                                                                                             |
| 7/4 | 1633270..1637761 | Deletion  | 4491 nt |           | autotransporter barrel domain-containing lipoprotein (cut after 4580bp, 5421bp gene), transcriptional regulator, serine threonine kinase, SIR2 family protein, ISNCY family transposase (first 293bp left, gene 1033bp) |



**Table S4** Best plasmid matches for the ESBL-plasmids in ST131.

| Plasmid  | Match in GenBank                              | Sequence identity (%) | Query coverage (%) | ST type | Size plasmid (kbp) | Accession nr |
|----------|-----------------------------------------------|-----------------------|--------------------|---------|--------------------|--------------|
| p2/0.1   | <i>E. coli</i> IMT16316 pEcIMT16316           | 99                    | 80                 | 648     | 184                | CP023816.1   |
|          | <i>E. coli</i> ZH193 plasmid pZH193           | 99                    | 77                 | 131     | 210                | CP014498.1   |
| p4/0.1   | <i>E. coli</i> NCTC 13441 plasmid: p.         | 100                   | 96                 | 131     | 161                | LT632321.1   |
| p4/1-1.1 | <i>E. coli</i> YDC107 plasmid pYDC107_184     | 99                    | 86                 | 964     | 184                | CP025708.1   |
|          | <i>E. coli</i> CREC-532 CREC-532_1            | 99                    | 86                 | 167     | 216                | CP024831.1   |
|          | <i>E. coli</i> CREC-629 CREC-629_1            | 99                    | 86                 | 167     | 176                | CP024816.1   |
|          | <i>E. coli</i> NCTC 13441 plasmid: p.         | 100                   | 66                 | 131     | 161                | LT632321.1   |
| p4/4.1   | <i>E. coli</i> CA28 plasmid pCA28             | 99                    | 95                 | 44      | 172                | CP009232.1   |
|          | <i>E. coli</i> AR_0372 plasmid unnamed1       | 99                    | 95                 | 405     | 170                | CP027130.1   |
|          | <i>E. coli</i> AR_0014 plasmid unitig_1_pilon | 99                    | 95                 | 167     | 173                | CP024860.1   |
|          | <i>E. coli</i> CA14 plasmid pCA14             | 99                    | 88                 | 131     | 155                | CP009231.1   |

**Table S5** Small cryptic plasmids.

| Isolate | Plasmid  | Plasmid size/replicon <sup>a</sup> | Best match in GenBank (identity/query coverage)                |
|---------|----------|------------------------------------|----------------------------------------------------------------|
| 2/0     | p2/0.2   | 4063 bp / ND                       | pEC147-4 (JX238455) (99%/100%)                                 |
|         | p2/0.3   | 2331 bp / ND                       | No match                                                       |
|         | p2/0.4   | 2105 bp / Col(BS512)               | pEC135-1 (JX238451) (99%/100%)                                 |
|         | p2/0.5   | 1552 bp / ND                       | pJJ1886 (CP006785) (100%/100%)                                 |
| 2/1     | p2/1.2   | 4063 bp / ND                       | pEC147-4 (JX238455) (99%/100%)                                 |
|         | p2/1.3   | 2331 bp / ND                       | No match                                                       |
|         | p2/1.4   | 2105 bp / Col(BS512)               | pEC135-1 (JX238451) (99%/100%)                                 |
|         | p2/1.5   | 1552 bp / ND                       | pJJ1886 (CP006785) (100%/100%)                                 |
| 2/2     | p2/2.2   | 4063 bp / ND                       | pEC147-4 (JX238455) (99%/100%)                                 |
|         | p2/2.3   | 2331 bp / ND                       | No match                                                       |
|         | p2/2.4   | 2105 bp / Col(BS512)               | pEC135-1 (JX238451) (99%/100%)                                 |
|         | p2/2.5   | 1552 bp / ND                       | pJJ1886 (CP006785) (100%/100%)                                 |
| 2/3     | p2/3.2   | 4063 bp / ND                       | pEC147-4 (JX238455) (99%/100%)                                 |
|         | p2/3.3   | 2331 bp / ND                       | No match                                                       |
|         | p2/3.4   | 2105 bp / Col(BS512)               | pEC135-1 (JX238451) (99%/100%)                                 |
|         | p2/3.5   | 1552 bp / ND                       | pJJ1886 (CP006785) (100%/100%)                                 |
| 2/4     | p2/4.2   | 4063 bp / ND                       | pEC147-4 (JX238455) (99%/100%)                                 |
|         | p2/4.3   | 2331 bp / ND                       | No match                                                       |
|         | p2/4.4   | 2105 bp / Col(BS512)               | pEC135-1 (JX238451) (99%/100%)                                 |
|         | p2/4.5   | 1552 bp / ND                       | pJJ1886 (CP006785) (100%/100%)                                 |
| 4/0     | p4/0.3   | 10,612 bp / ColRNAI                | p2 (CP006658) (99%/94%)                                        |
| 4/1-1   | p4/1-1.3 | 7939 bp / ND                       | pHUSEC41-3 (99%/100%)                                          |
|         | p4/1-1.4 | 5167 bp / ND                       | pASL01a (JQ480155) (99%/100%)                                  |
| 4/1-2   | p4/1-2.3 | 8809 bp / ND                       | pKpn113c (CP003995) (99%/67%)                                  |
|         | p4/1-2.4 | 2044 bp / ND                       | No match                                                       |
| 4/2-1   | p4/2-1.3 | 5163 bp / ND                       | pASL01a (JQ480155) (99%/100%)                                  |
|         | p4/2-1.4 | 2640 bp / ND                       | Differ from 4/1-1 at 50 positions                              |
|         | p4/2-1.5 | 2089 bp / Col(BS512)               | pSj-2 (CP011067) (100%/100%)<br>pEC147-2 (JX238453) (99%/100%) |
| 4/2-2   | p4/2-2.2 | 5167 bp / ND                       | pASL01a (JQ480155) (99%/100%)                                  |
|         | p4/2-2.3 | 4087 bp / ND                       | pMNCRE44_2 (CP010878) (100%/100%)                              |
| 4/2-3   | p4/2-3.2 | 8809 bp / ND                       | pKpn113c (CP003995) (99%/67%)                                  |
|         | p4/2-3.3 | 2044 bp / ND                       | No match                                                       |
| 4/3-1   | p4/3-1.4 | 7939 bp / ND                       | pHUSEC41-3 (99%/100%)                                          |
|         | p4/3-1.5 | 5163 bp / ND                       | pASL01a (JQ480155) (99%/100%)                                  |
|         | p4/3-1.6 | 2640 bp / ND                       | Differ from 4/1-1 at 50 positions                              |
|         | p4/3-1.7 | 2089 bp / Col(BS512)               | pSj-2 (CP011067) (100%/100%)<br>pEC147-2 (JX238453) (99%/100%) |
| 4/3-2   | p4/3-2.3 | 7939 bp / ND                       | pHUSEC41-3 (99%/100%)                                          |
|         | p4/3-2.4 | 5167 bp / ND                       | pASL01a (JQ480155) (99%/100%)                                  |
|         | p4/3-2.5 | 4087 bp / ND                       | pMNCRE44_2 (CP010878) (100%/100%)                              |
| 4/4     | p4/4.4   | 7939 bp / ND                       | pHUSEC41-3 (HE603112) (99%99%)                                 |
|         | p4/4.5   | 5167 bp / ND                       | pASL01a (JQ480155) (99%/100%)                                  |
|         | p4/4.6   | 4087 bp / ND                       | pMNCRE44_2 (CP010878) (100%/100%)                              |
|         | p4/4.7   | 4072 bp / ND                       | pMNCRE44_2 (CP010878) (100%/98%)                               |
| 7/0     | p7/0.2   | 4072 bp / ND                       | pSF-486-4 (CP012629) 100%/100%                                 |
|         | p7/0.3   | 1552 bp / ND                       | pJJ1886 (CP006785) (99%/100%)                                  |
| 7/1     | p7/1.3   | 4072 bp / ND                       | pSF-486-4 (CP012629) 100%/100%                                 |
|         | p7/1.4   | 1552 bp / ND                       | pJJ1886 (CP006785) (99%/100%)                                  |
| 7/2     | p7/2.4   | 4072 bp / ND                       | pSF-486-4 (CP012629) 100%/100%                                 |
|         | p7/2.5   | 1552 bp / ND                       | pJJ1886 (CP006785) (99%/100%)                                  |
| 7/3     | p7/3.3   | 4072 bp / ND                       | pSF-486-4 (CP012629) 100%/100%                                 |
|         | p7/3.4   | 1552 bp / ND                       | pJJ1886 (CP006785) (99%/100%)                                  |
| 7/4     | p7/4.2   | 4072 bp / ND                       | pSF-486-4 (CP012629) 100%/100%                                 |
|         | p7/4.3   | 1552 bp / ND                       | pJJ1886 (CP006785) (99%/100%)                                  |

a) PlasmidFinder, ND = not detected
